# Supplementary material for: Population-level associations of achievement of targets for bone-mineral markers with survival in haemodialysis patients with mildly elevated intact-PTH levels: a case-cohort study
Source: PubMed Central journal article supplement (PMC6683189; doi:10.1038/s41598-019-47852-8), 2019-08-05
Supplement: 41598_2019_47852_MOESM1_ESM.pdf [file 41598_2019_47852_MOESM1_ESM.pdf]

1 **Population-level associations of achievement of targets for bone-mineral markers**  
2 **with survival in haemodialysis patients with mildly elevated intact-PTH levels: a**  
3 **case-cohort study**

4

5 Shingo Fukuma, Shunichi Fukuhara, Sayaka Shimizu, Tadao Akizawa, Masafumi

6 Fukagawa

7 **Supplementary Information**

8

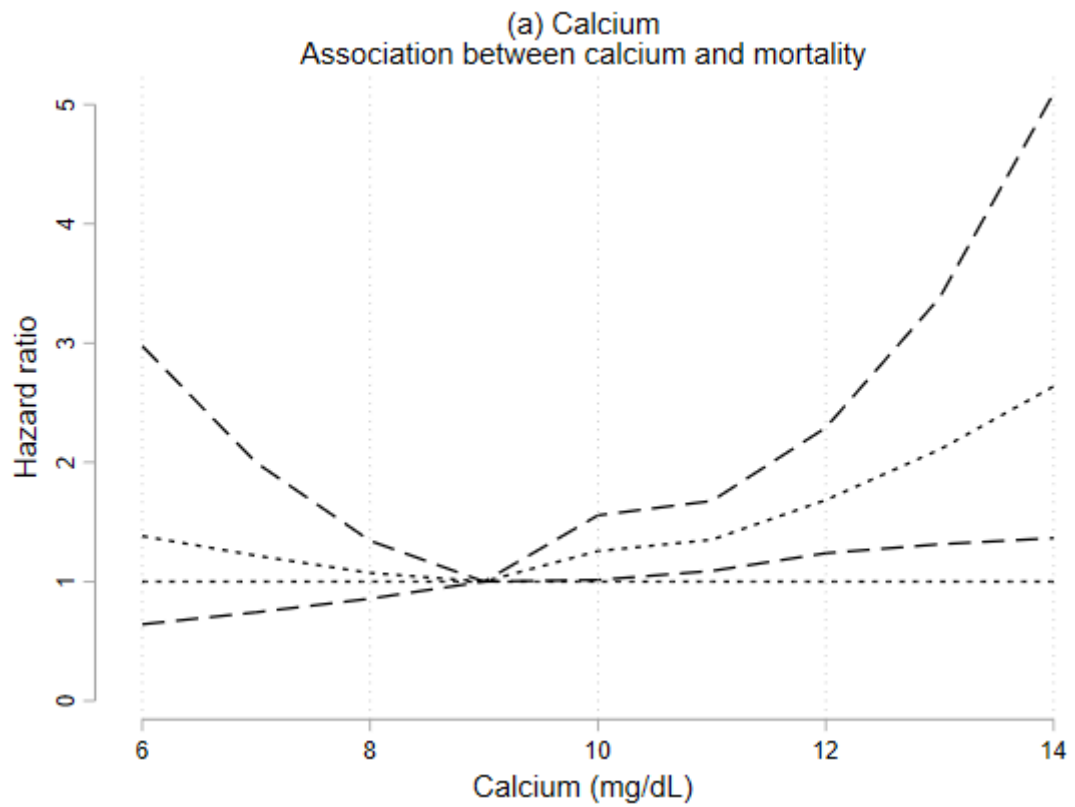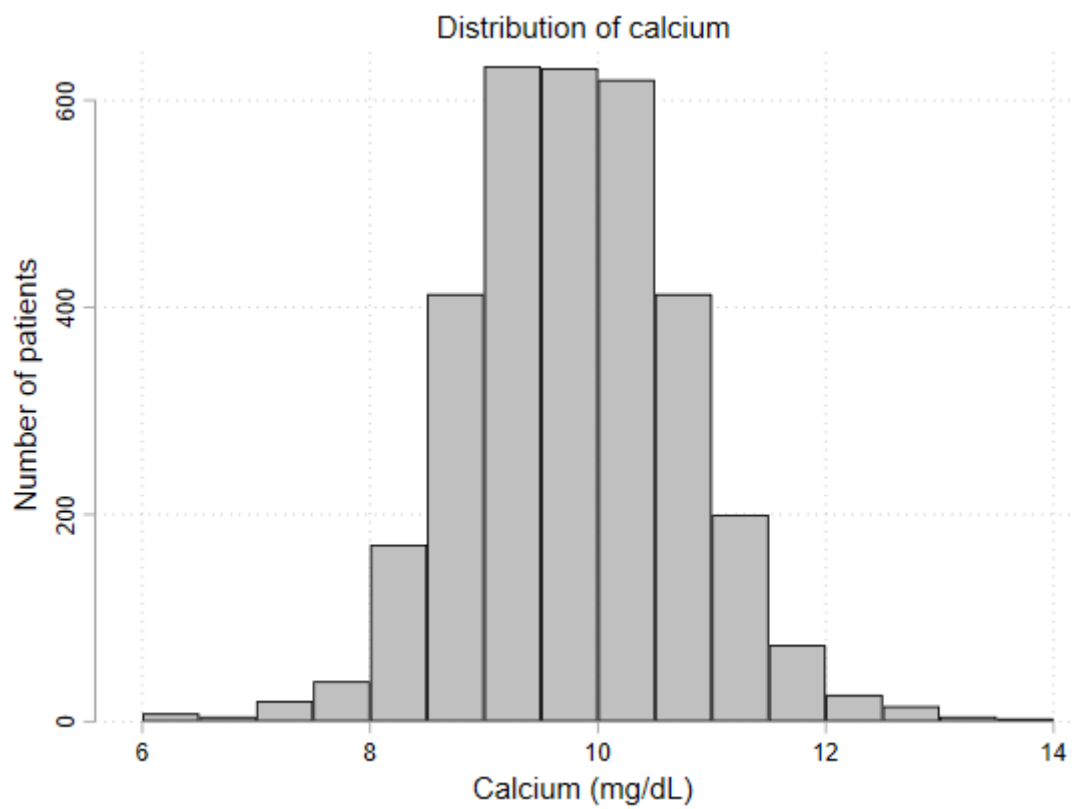

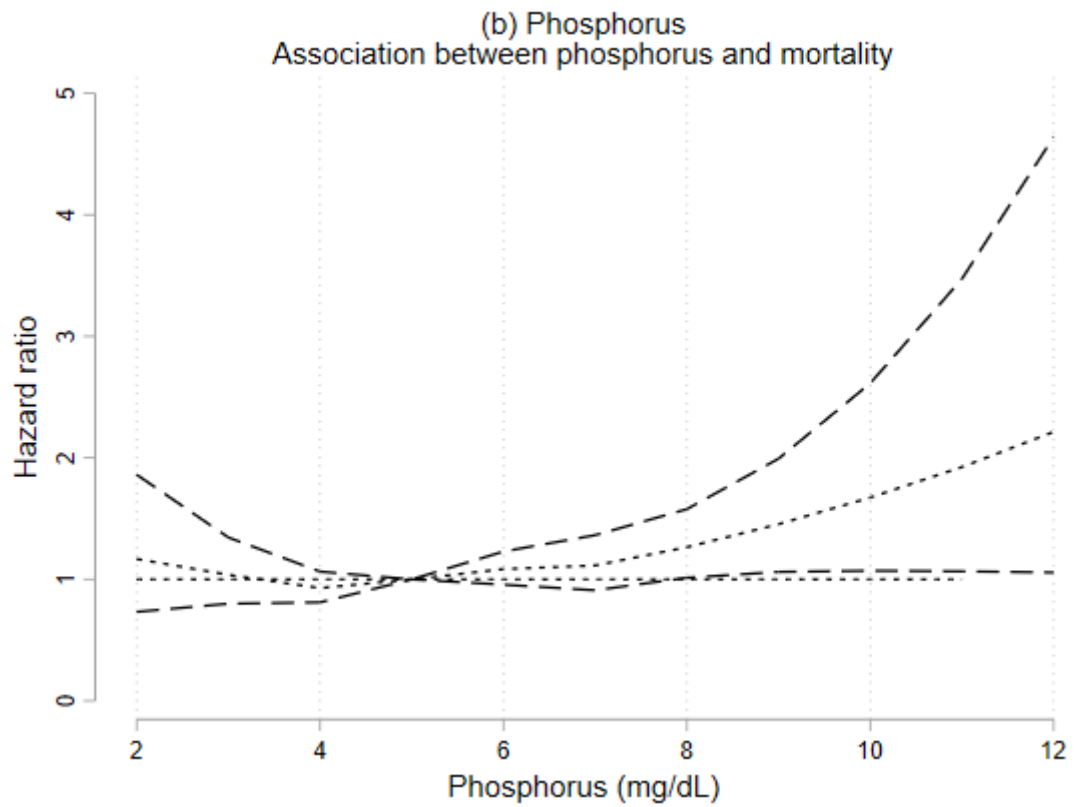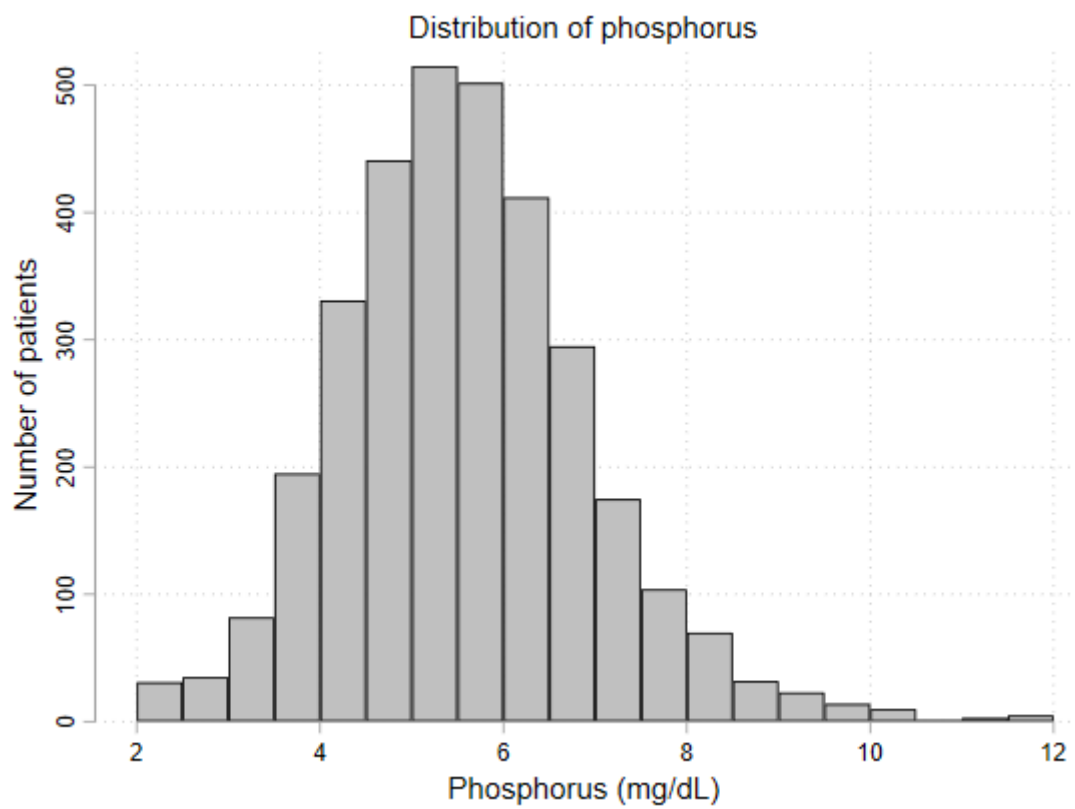

10

11

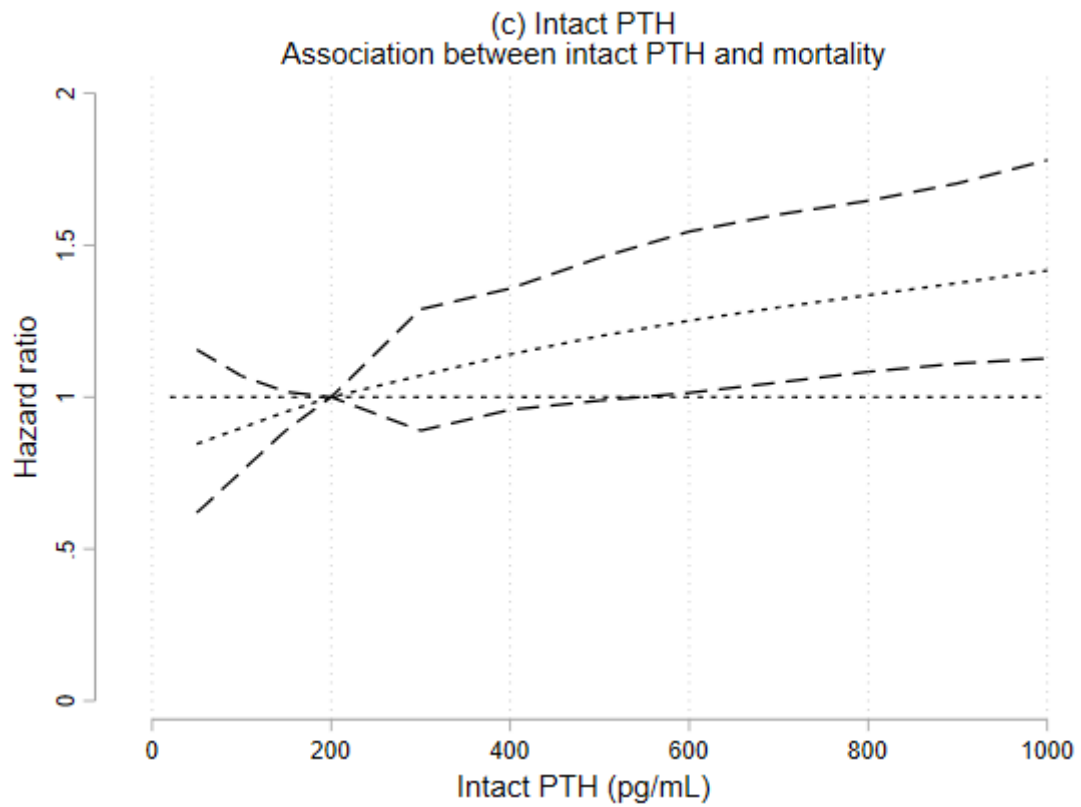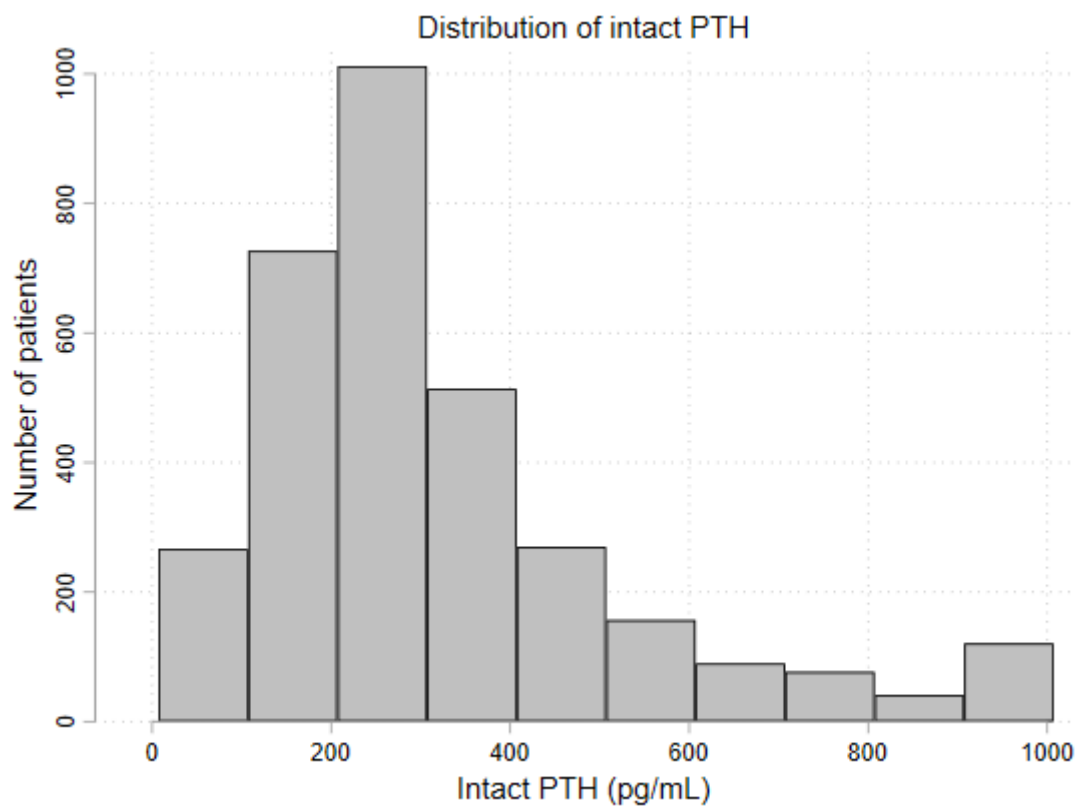

13 Supplementary Figure S1. Nonlinear associations between bone mineral markers and  
14 all-cause mortality and distribution of bone mineral markers: (a) calcium, (b)  
15 phosphorus and (c) intact parathyroid hormone (PTH). For the nonlinear association,  
16 we developed multivariable Cox regression models using restricted cubic splines with  
17 five knots (at percentiles 5, 27.5, 50th, 72.5 and 95) after adjusting for other bone  
18 mineral markers, age, sex, dialysis duration, serum albumin, cardiovascular disease,  
19 hypertension, diabetes mellitus, cancer, single-pool Kt/V and body mass index.

20

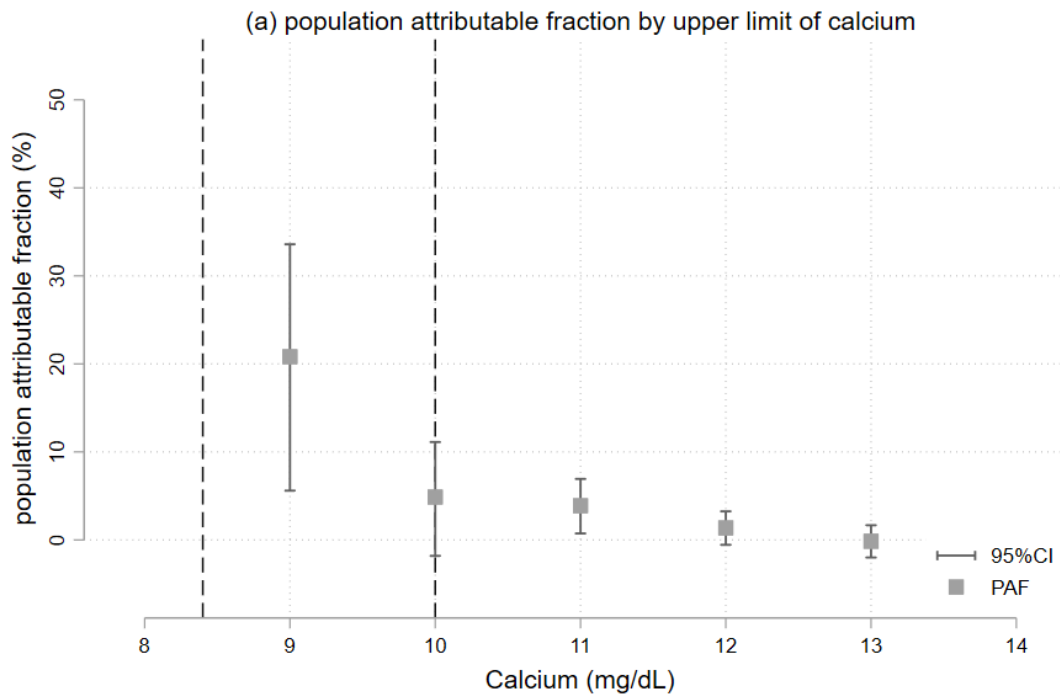

21

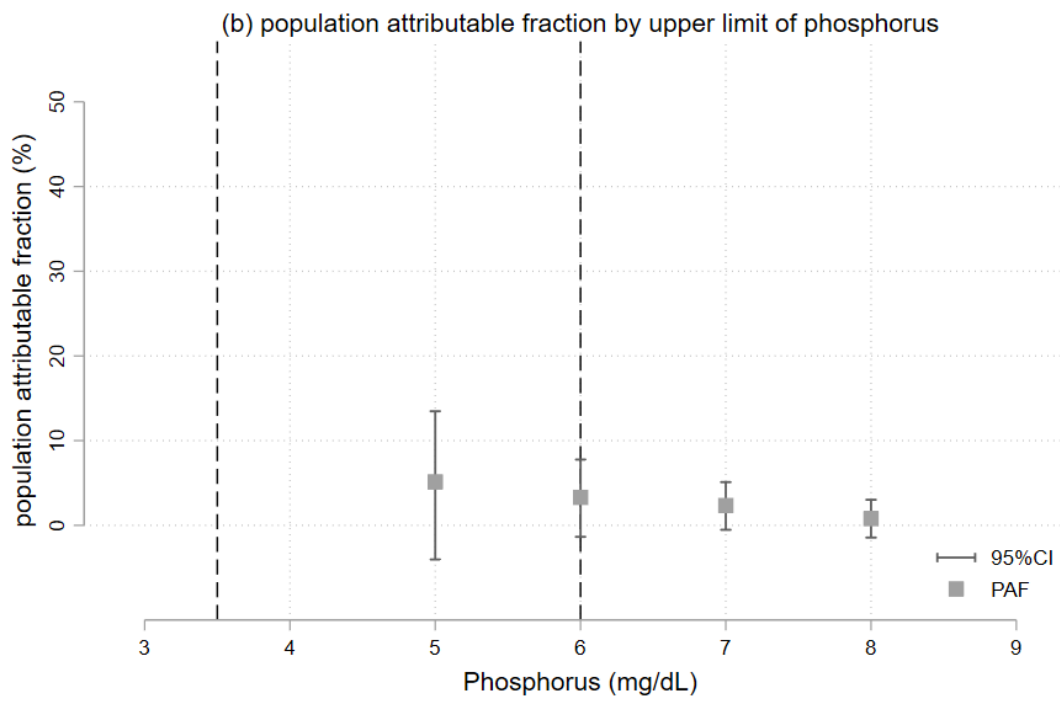

22

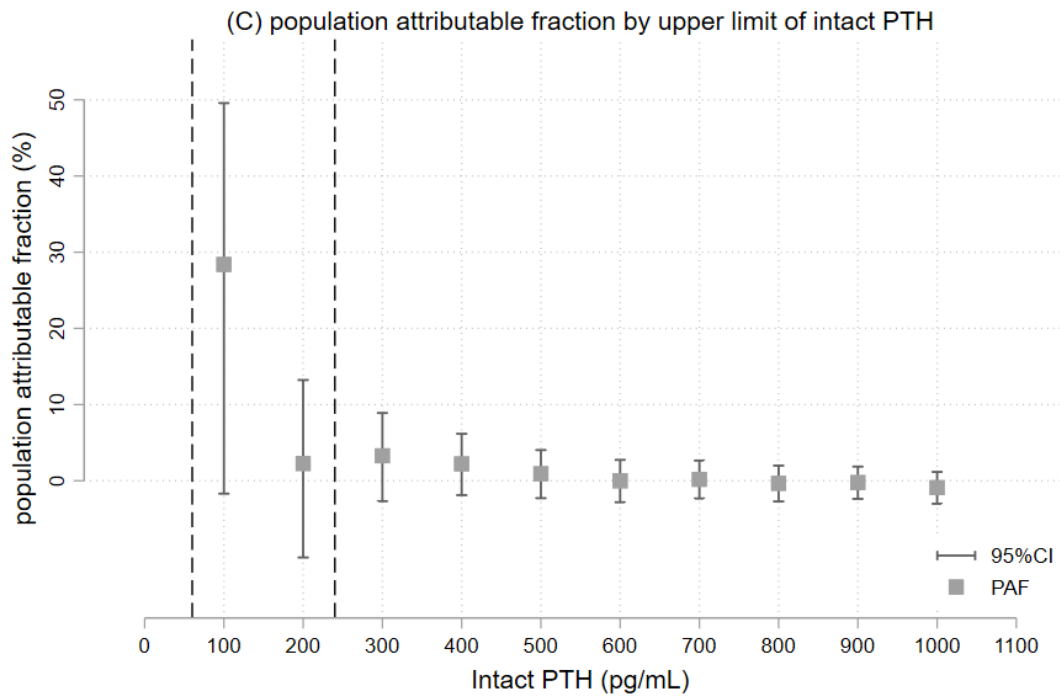

23

24 Supplementary Figure S2. Population-attributable fractions (PAFs) for bone mineral

25 markers by different upper cutoff values. To estimate the population-level impact of

26 (a) calcium, (b) phosphorus and (c) intact parathyroid hormone, we computed the

27 PAFs using different cutoff values for those bone mineral markers.

28

29 Supplemental Table 1. Association of mortality with calcium, phosphorus, and intact  
 30 PTH, with adjustment for MBD-related medications by stratification based on  
 31 cinacalcet use

|                           | Cinacalcet non-user<br>N=2,611<br>Hazard ratio (95% CI) | Cinacalcet user<br>N=1,384<br>Hazard ratio (95% CI) |
|---------------------------|---------------------------------------------------------|-----------------------------------------------------|
| <b>Calcium (mg/dL)</b>    |                                                         |                                                     |
| <8                        | 2.19 (1.41-3.40)                                        | 2.67 (0.24-30.43)                                   |
| 8-8.9                     | Reference                                               | Reference                                           |
| 9-9.9                     | 1.59 (1.28-1.98)                                        | 1.65 (0.45-6.07)                                    |
| 10-10.9                   | 2.17 (1.66-2.83)                                        | 2.25 (0.63-8.03)                                    |
| 11-11.9                   | 2.87 (2.03-4.04)                                        | 3.54 (0.92-13.63)                                   |
| 12+                       | 4.95 (2.89-8.48)                                        | 2.58 (0.47-14.29)                                   |
| <b>Phosphorus (mg/dL)</b> |                                                         |                                                     |
| <3                        | 1.17 (0.77-1.80)                                        | 1.57 (0.31-8.00)                                    |
| 3-3.9                     | 0.96 (0.73-1.27)                                        | 1.43 (0.58-3.50)                                    |
| 4-4.9                     | Reference                                               | Reference                                           |
| 5-5.9                     | 1.21 (0.99-1.48)                                        | 1.61 (0.93-2.80)                                    |
| 6-6.9                     | 1.28 (1.02-1.62)                                        | 1.05 (0.55-2.01)                                    |
| 7+                        | 1.79 (1.37-2.35)                                        | 1.59 (0.81-3.11)                                    |
| <b>Intact PTH (pg/mL)</b> |                                                         |                                                     |
| <100                      | 0.71 (0.53-0.98)                                        | 0.21 (0.03-1.60)                                    |
| 100-199                   | 1.05 (0.85-1.28)                                        | 0.96 (0.53-1.76)                                    |



|         | Reference        | Reference        |
|---------|------------------|------------------|
| 200-299 |                  |                  |
| 300-399 | 1.34 (1.07-1.67) | 0.59 (0.31-1.11) |
| 400-499 | 1.70 (1.24-2.32) | 0.84 (0.44-1.64) |
| 500-599 | 1.42 (0.96-2.09) | 1.62 (0.82-3.18) |
| 600-699 | 1.90 (1.14-3.16) | 0.70 (0.23-2.14) |
| 700+    | 1.98 (1.43-2.74) | 1.24 (0.66-2.33) |

- 32 Adjusted for age, sex, dialysis duration, serum albumin, cardiovascular disease,
- 33 hypertension, diabetes mellitus, cancer, single-pool Kt/V, body mass index,
- 34 intravenous Vitamin D use, and phosphate binder use.
- 35 CI, confidence interval; PTH, parathyroid hormone.
